# Supplementary material for: Multi-Analytical Approach to Characterize the Degradation of Different Types of Microplastics: Identification and Quantification of Released Organic Compounds
Source: MDPI journal article supplement (doi:10.3390/molecules28031382), 2023-02-01
Supplement: s1 [file s1]

**Table S1.** Compounds found at  $t_0$  and after 4 weeks ( $t_0+4w$ ) of aging of the investigated polymers. HDPE: high density polyethylene; LDPE: low density polyethylene; PET: polyethylene terephthalate; PP: polypropylene; PS: polystyrene.

| Compounds                        | Tr<br>(min) | HDPE<br>at $t_0$ | HDPE<br>at $t_0+4w$ | LDPE<br>at $t_0$ | LDPE<br>at $t_0+4w$ | PET<br>at $t_0$ | PET<br>at $t_0+4w$ | PP<br>at $t_0$ | PP<br>at $t_0+4w$ | PS<br>at $t_0$ | PS<br>at $t_0+4w$ |
|----------------------------------|-------------|------------------|---------------------|------------------|---------------------|-----------------|--------------------|----------------|-------------------|----------------|-------------------|
| Acetone                          | 9,52        | X                | X                   | X                | X                   | X               | X                  | X              | X                 |                | X                 |
| Acetic acid, methyl ester        | 11,49       |                  |                     |                  |                     |                 |                    |                |                   |                | X                 |
| Silanol, trimethyl-              | 14,23       |                  |                     |                  |                     | X               | X                  | X              | X                 | X              | X                 |
| Pentane, 2-methyl-               | 14,27       |                  |                     |                  |                     |                 |                    | X              |                   |                |                   |
| Methacrolein                     | 14,48       |                  |                     |                  |                     | X               |                    |                |                   |                |                   |
| Formic acid, 1-methylethyl ester | 14,99       |                  |                     |                  |                     |                 |                    |                |                   |                |                   |
| Acetic acid                      | 15,22       | X                | X                   | X                | X                   | X               | X                  | X              |                   | X              |                   |
| Pentane, 3-methyl-               | 15,49       |                  |                     |                  |                     |                 |                    | X              |                   |                |                   |
| Methyl vinyl ketone              | 15,79       |                  | X                   |                  | X                   |                 |                    |                | X                 | X              |                   |
| 2,3-Butanedione                  | 16,06       |                  |                     |                  |                     |                 |                    |                |                   |                |                   |
| Butanal                          | 16,32       | X                |                     | X                | X                   |                 | X                  |                |                   |                |                   |
| Propanal, 2-methyl-              | 16,35       |                  |                     |                  |                     |                 |                    | X              |                   |                |                   |
| n-Hexane                         | 16,78       |                  |                     |                  |                     |                 |                    | X              |                   |                | X                 |
| 2-Butanone                       | 16,79       |                  |                     | X                |                     |                 | X                  |                | X                 |                | X                 |
| Furan, 3-methyl-                 | 17,07       |                  |                     |                  |                     | X               |                    |                |                   |                |                   |
| Trichloromethane                 | 18,94       |                  |                     |                  |                     |                 |                    |                |                   |                |                   |
| Tetrahydrofuran                  | 19,35       | X                |                     | X                |                     | X               | X                  |                |                   | X              |                   |
| Ethyl Acetate                    | 19,36       |                  |                     | X                |                     |                 |                    |                | X                 | X              | X                 |
| Cyclopentane, methyl-            | 19,42       |                  |                     |                  |                     |                 |                    | X              |                   |                |                   |
| Cyclopentene, 3-methyl-          | 19,91       |                  |                     |                  |                     |                 |                    |                | X                 |                |                   |
| 2-Propanone, 1-hydroxy-          | 21,79       |                  |                     |                  |                     |                 |                    |                |                   |                |                   |
| Benzene, pentafluoro-            | 21,92       |                  |                     | X                | X                   | X               | X                  | X              | X                 | X              | X                 |
| Cyclohexane                      | 22,15       |                  |                     |                  |                     |                 |                    |                | X                 |                |                   |
| Benzene                          | 22,46       | X                | X                   | X                |                     |                 |                    | X              |                   |                | X                 |
| 1-Propen-2-ol, acetate           | 22,54       |                  |                     |                  |                     |                 |                    |                | X                 |                |                   |
| Furan, 2,3-dihydro-5-methyl-     | 22,91       | X                |                     |                  |                     |                 |                    |                |                   |                |                   |
| Propanoic acid                   | 23,17       | X                |                     |                  |                     |                 | X                  |                |                   | X              |                   |
| 2-Propenoic acid                 | 23,26       |                  |                     |                  |                     |                 | X                  |                |                   |                |                   |
| 2-Pentanone                      | 23,53       |                  |                     |                  |                     | X               | X                  |                | X                 | X              | X                 |
| 2-Butanone, 3-methyl-            | 23,55       |                  |                     |                  |                     |                 | X                  |                |                   |                |                   |

[illegible]

|                                   |       |   |   |   |   |   |   |   |   |   |
|-----------------------------------|-------|---|---|---|---|---|---|---|---|---|
| Heptane, 3-methyl-                | 29,32 |   |   |   |   |   |   |   |   |   |
| Butanoic acid                     | 29,50 |   |   |   |   |   |   | X |   |   |
| Acetylacetone                     | 29,76 |   |   |   |   |   |   | X |   |   |
| 2-Butenoic acid, (E)-             | 29,84 |   |   |   |   |   |   | X |   |   |
| CH3C(O)CH2CH2OH                   | 30,07 |   |   |   |   |   |   | X |   |   |
| 2-Hexanone                        | 30,17 |   |   |   |   |   |   |   |   | X |
| Toluene                           | 30,18 | X |   |   |   |   |   |   |   |   |
| Pentanal, 2-methyl-               | 30,18 |   |   |   |   |   |   |   |   |   |
| Butane, 1-(2-propenyloxy)-        | 30,18 |   |   |   |   |   |   |   |   |   |
| 2-Pentanone, 3-methylene-         | 30,29 |   |   |   |   |   |   |   |   |   |
| 1-Methylallyl acetate             | 30,41 |   |   |   |   |   |   |   |   |   |
| Cyclopentanone                    | 30,55 |   |   |   |   |   |   |   |   | X |
| 1,3-Cyclohexadiene, 5,6-dimethyl- | 30,57 |   |   |   |   |   |   |   |   |   |
| 2-Butenal, 2-methyl-              | 30,57 |   |   |   |   |   |   |   |   |   |
| Propanoic acid, TMS derivative    | 30,60 |   |   |   |   |   |   | X |   |   |
| 3-Penten-2-one, 4-methyl-         | 30,77 |   |   |   |   |   |   |   |   |   |
| Furan, 2-methoxy-                 | 30,77 |   |   |   | X |   |   |   | X | X |
| 3-Penten-2-one, 4-methyl-         | 30,77 |   |   | X |   |   |   |   |   |   |
| 1,1-Ethenediol, diacetate         | 30,90 |   |   |   |   |   |   | X |   |   |
| 2-Hexanone                        | 30,93 |   | X |   |   |   |   |   |   |   |
| Octane                            | 30,93 |   |   |   |   |   | X |   |   |   |
| Hexanal                           | 30,93 |   |   | X |   | X |   |   | X | X |
| 2-Butenoic acid, (E)-             | 31,06 |   |   |   |   | X |   |   |   |   |
| Acetic acid, butyl ester          | 31,56 |   |   | X |   | X |   |   |   | X |
| Furan, 2,3,5-trimethyl-           | 31,75 |   |   |   |   |   |   | X |   |   |
| 2-Pentanone, 4-hydroxy-           | 31,94 |   |   | X |   |   |   | X |   |   |
| Heptane, 2,4-dimethyl-            | 32,20 |   |   |   |   |   | X |   |   |   |
| Heptane, 3-methyl-                | 32,20 |   |   |   |   |   |   |   |   |   |
| Ethanol, 2-(1,1-dimethylethoxy)-  | 32,45 |   |   |   |   |   | X |   |   |   |
| Benzonitrile, pentafluoro-        | 32,68 |   |   |   |   | X |   |   |   |   |
| 2-Pentanone, 4-hydroxy-4-methyl-  | 33,27 |   |   | X |   |   |   | X |   |   |

[illegible]

[illegible]

|                                      |       |   |   |   |   |   |   |   |   |   |  |   |
|--------------------------------------|-------|---|---|---|---|---|---|---|---|---|--|---|
| 2(3H)-Furanone, dihydro-5-methyl-    | 39,57 |   | X |   | X |   |   |   | X |   |  |   |
| Pentanoic acid                       | 39,84 |   |   |   | X |   |   |   |   |   |  |   |
| Heptane, 2,2,3,5-tetramethyl-        | 39,92 |   |   |   |   |   |   |   |   |   |  |   |
| Octane, 2,2,6-trimethyl-             | 39,92 |   |   |   |   |   |   |   |   |   |  |   |
| 2H-Pyran-2-one, tetrahydro-          | 39,94 |   |   |   |   |   |   |   |   |   |  |   |
| Hexanoic acid                        | 39,94 |   |   |   | X |   |   |   |   |   |  |   |
| 1-Heptanol                           | 40,18 |   |   |   |   |   |   |   |   |   |  |   |
| 2,4-Pentanedione, 3-ethyl-           | 40,21 |   |   |   |   |   |   |   | X |   |  |   |
| 2-Cyclopenten-1-one, 3-methyl-       | 40,36 |   |   |   |   |   |   |   |   |   |  |   |
| 3-Isopropyl-5-methylhexan-2-one      | 40,46 |   |   |   |   |   |   |   |   |   |  |   |
| Phenol                               | 40,47 |   |   |   |   |   |   | X |   |   |  | X |
| Benzaldehyde                         | 40,54 |   | X | X | X | X | X | X |   | X |  | X |
| 2-Butanone, 4-(acetyloxy)-           | 40,66 |   |   |   |   | X |   |   |   | X |  |   |
| Octane, 2,2,6-trimethyl-             | 40,74 |   |   |   |   |   |   |   |   |   |  |   |
| Benzene, 1,2,4-trimethyl-            | 40,76 |   |   |   |   |   |   |   | X |   |  |   |
| Pentanoic acid, 4-oxo-, methyl ester | 40,95 |   |   |   |   |   |   |   |   |   |  | X |
| 1,9-Decadiene                        | 41,02 |   |   |   |   |   |   |   |   |   |  |   |
| 1H-Pyrrole-2,5-dione                 | 41,10 |   |   |   |   | X |   | X |   |   |  |   |
| 3-Octanone                           | 41,11 |   |   |   |   |   |   |   |   |   |  |   |
| 3-Pentenoic acid, 4-methyl-          | 41,14 |   |   |   |   |   |   |   |   |   |  | X |
| Benzaldehyde                         | 41,31 | X | X |   |   |   |   |   |   |   |  |   |
| 2-Octanone                           | 41,32 |   |   |   |   |   |   |   |   |   |  | X |
| Cyclopropane, 1,2-dimethyl-1-pentyl- | 41,41 |   |   |   |   |   |   |   |   |   |  |   |
| 1-Decene                             | 41,42 |   |   |   |   |   |   |   |   |   |  |   |
| Furan, 2-pentyl-                     | 41,50 |   | X | X | X |   | X |   |   |   |  | X |
| tert-Butylamine, N-ethyl-N-nitroso-  | 41,55 |   |   |   |   |   |   | X |   |   |  |   |
| Heptane, 2,2,4,6,6-pentamethyl-      | 41,69 | X |   |   |   |   |   |   |   |   |  |   |
| Decane                               | 41,80 |   |   |   |   | X |   | X |   | X |  |   |
| Octane, 2,7-dimethyl-                | 41,81 |   |   | X |   |   |   |   |   |   |  |   |
| 2-Furanone, 2,5-dihydro-3,5-dimethyl | 41,85 |   |   |   |   |   |   |   | X |   |  |   |

|                                                  |       |   |   |   |   |   |   |   |   |   |   |   |
|--------------------------------------------------|-------|---|---|---|---|---|---|---|---|---|---|---|
| Octane, 2,6,6-trimethyl-                         | 41,98 |   |   |   |   |   |   |   |   |   |   |   |
| Octanal                                          | 42,01 |   |   | X | X | X | X | X |   | X | X |   |
| Decane                                           | 42,01 | X |   |   |   |   |   |   |   |   |   |   |
| Nonane, 2,6-dimethyl-                            | 42,17 |   |   |   |   |   |   | X |   |   |   |   |
| 2(5H)-Furanone, 3,5,5-trimethyl-                 | 42,24 |   |   |   |   |   |   |   | X |   |   |   |
| 1,2-Propanediol, diacetate                       | 42,31 |   |   |   |   |   |   |   | X |   |   |   |
| Nonane, 2,6-dimethyl-                            | 42,35 |   |   |   |   |   |   | X |   |   |   |   |
| Benzofuran                                       | 42,37 |   |   |   |   |   |   |   |   |   |   | X |
| Heptane, 2,2,4,6,6-pentamethyl-                  | 42,56 |   |   |   | X |   |   |   |   |   |   |   |
| Propanoic acid, 2-methyl-,<br>anhydride          | 42,69 |   |   |   |   |   |   |   |   |   |   |   |
| Benzene, (2-methylpropyl)-                       | 42,70 |   |   |   |   |   |   |   |   | X |   |   |
| Benzene, (bromomethyl)pentafluoro-               | 42,81 | X | X | X | X | X | X | X | X | X | X |   |
| Octanal                                          | 42,81 | X | X |   |   |   |   |   |   |   |   |   |
| Heptane, 5-ethyl-2,2,3-trimethyl-                | 42,82 |   |   |   |   |   |   |   |   |   |   |   |
| Formic acid, heptyl ester                        | 42,94 |   |   |   |   |   |   |   |   |   |   |   |
| Acetic acid, 1-methyl-3-oxo-but-<br>1-enyl ester | 42,98 |   |   |   |   |   |   |   | X |   |   |   |
| Tetrasiloxane, decamethyl-                       | 43,23 |   |   |   |   |   |   |   |   |   |   |   |
| Heptane, 2,2,4,6,6-pentamethyl-                  | 43,23 |   |   |   |   |   |   |   |   |   |   |   |
| Acetic acid, (acetyloxy)-                        | 43,30 |   |   |   |   |   |   |   |   |   |   |   |
| 2,2,4,4-Tetramethyloctane                        | 43,39 |   |   |   |   |   |   |   |   |   |   |   |
| Formic acid, heptyl ester                        | 43,54 |   |   |   |   |   |   |   |   |   |   |   |
| Octane, 6-ethyl-2-methyl-                        | 43,55 |   |   |   | X |   |   |   |   |   |   |   |
| Benzyl alcohol                                   | 43,56 |   |   |   |   |   |   |   |   |   |   | X |
| Octane, 2,6,6-trimethyl-                         | 43,57 | X |   |   |   |   |   |   |   |   |   |   |
| 6-Heptenoic acid                                 | 43,86 |   |   |   | X |   |   |   |   |   |   |   |
| Propanoic acid, 2-methyl-,<br>anhydride          | 43,88 |   |   |   |   |   |   |   |   |   |   |   |
| Hexanoic acid                                    | 43,99 |   |   |   |   | X | X |   |   |   |   |   |
| Nonane, 4,5-dimethyl-                            | 44,08 |   |   |   |   |   |   | X |   |   |   |   |
| Benzeneacetaldehyde                              | 44,09 |   |   |   |   |   | X |   |   | X | X |   |
| Heptanoic acid                                   | 44,15 |   |   |   | X |   |   |   |   |   |   |   |





[illegible]

|                                                      |       |   |   |   |   |   |   |
|------------------------------------------------------|-------|---|---|---|---|---|---|
| Butanoic acid, 3-hexenyl ester, (Z)-                 | 49,51 |   |   |   |   |   |   |
| Cyclobutanecarboxylic acid, 3-methylbut-2-enyl ester | 49,55 | X |   |   |   |   |   |
| Undecane, 5-methyl-                                  | 49,67 | X |   |   |   |   |   |
| Benzothiazole                                        | 49,75 |   |   |   |   |   | X |
| Benzene, 1,3-bis(1,1-dimethylethyl)-                 | 49,76 |   | X |   |   |   |   |
| 1,2-Benzisothiazole                                  | 49,76 | X |   |   |   | X |   |
| Benzothiazole                                        | 49,79 |   | X |   |   |   |   |
| 1-Methoxydecane                                      | 49,84 |   |   |   |   |   |   |
| 2(3H)-Furanone, dihydro-5-propyl-                    | 49,93 |   | X |   |   |   |   |
| Undecane, 3-methyl-                                  | 50,09 | X |   |   |   |   |   |
| 1,11-Dodecadiene                                     | 50,09 |   |   |   |   |   |   |
| Octyl chloroformate                                  | 50,23 |   |   | X |   |   |   |
| 1-Nonanol                                            | 50,23 |   |   |   |   |   |   |
| 1-Dodecene                                           | 50,23 | X |   |   |   |   |   |
| Undecane, 4,7-dimethyl-                              | 50,37 |   |   | X |   |   |   |
| Oxalic acid, butyl propyl ester                      | 50,39 |   |   |   |   |   |   |
| Cinnamaldehyde, (E)-                                 | 50,40 |   |   |   |   |   | X |
| Cyclodecane, methyl-                                 | 50,49 | X |   |   |   |   |   |
| Decanal                                              | 50,62 |   |   | X | X |   |   |
| Undecane, 2,3-dimethyl-                              | 50,64 | X |   |   |   |   |   |
| Undecane, 4-ethyl-                                   | 50,64 | X |   |   |   |   |   |
| Undecane, 6-ethyl-                                   | 50,94 | X |   |   |   |   |   |
| Dodecane, 2,6,11-trimethyl-                          | 50,98 |   |   |   |   | X |   |
| Dodecane, 2,6,11-trimethyl-                          | 50,98 |   |   |   |   |   |   |
| Undecane, 3,8-dimethyl-                              | 51,14 |   |   |   |   | X |   |
| Undecane, 4,7-dimethyl-                              | 51,14 |   |   |   |   |   |   |
| 1-Decanol                                            | 51,16 |   | X |   |   |   |   |
| Dodecane, 5-methyl-                                  | 51,32 |   |   | X |   |   |   |
| 2-Undecanone                                         | 52,91 |   |   |   |   |   |   |
| Dodecane, 4,6-dimethyl-                              | 52,97 |   |   |   |   | X |   |

|                                              |       |   |  |   |   |   |   |
|----------------------------------------------|-------|---|--|---|---|---|---|
| 1-Tridecene                                  | 53,69 |   |  |   |   |   |   |
| Tridecane, 5-methyl-                         | 54,58 |   |  |   |   |   |   |
| n-Nonylcyclohexane                           | 55,21 |   |  | X |   |   |   |
| Benzene, (1-butylheptyl)-                    | 56,53 |   |  |   |   |   |   |
| Dodecane, 1-iodo-                            | 56,60 |   |  |   |   |   |   |
| Hexadecane                                   | 56,61 | X |  | X |   |   |   |
| Diphenyl sulfide                             | 56,72 |   |  |   |   | X | X |
| 2-Decanone                                   | 56,72 |   |  |   |   |   |   |
| Cyclopropanecarboxamide, N-(3-methylphenyl)- | 57,62 |   |  |   | X |   |   |
| Benzoic acid, phenyl ester                   | 57,91 |   |  |   |   |   |   |
